# Supplementary material for: Silver ion-regulated reliable and rapid detection technique for alkaline phosphatase based on surface-enhanced Raman spectroscopy
Source: Royal Society of Chemistry journal article supplement (doi:10.1039/d4ay01374c), 2024-01-01
Supplement: d4ay01374c1.pdf [file d4ay01374c1.pdf]

## Supporting information

# Silver ions-regulated reliable and rapid detection technique of alkaline phosphatase based on surface-enhanced Raman spectroscopy

Xiangru Bai,<sup>\*a</sup> Aiguo Shen,<sup>b</sup> Jiming Hu<sup>b</sup>

<sup>a</sup> School of Pharmacy, Xinyang Agriculture and Forestry University, Xinyang 464007, P.R. China.

<sup>b</sup> College of Chemistry and Molecular Sciences, Wuhan University, Wuhan 430072, P.R. China

<sup>\*</sup>To whom correspondence should be addressed.

Dr. X. R. Bai, E-mail: baimaster@126.com.

### List of contents

1. **Fig. S1.** The chemical structure of MBN.
2. **Fig. S2.** The schematic diagram between the functionalized Au NPs and Ag<sup>+</sup>.
3. **Fig. S3.** (A) The TEM image of functionalized Au NPs with different concentration of Ag<sup>+</sup> (1 nM, 10 nM, 100 nM), (B) The TEM image of functionalized Au NPs with different concentration of Ag<sup>+</sup> (1000 nM).
4. **Fig. S4.** (A) Figure of color change of the functional Au NPs with different concentration of Ag<sup>+</sup>, (B) UV-*vis* spectroscopy of the functional Au NPs with different concentration of Ag<sup>+</sup>.
5. **Fig. S5.** (A) SERS spectroscopy of the detection system for different concentration of ALP.
6. **Table S1.** Comparison of the performance of the SERS based ALP detection technique with the other existing methods
7. **Fig. S6.** Stability of functional Au NPs over a period of six months.

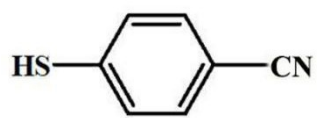

MBN

**Fig. S1.** The chemical structure of MBN.

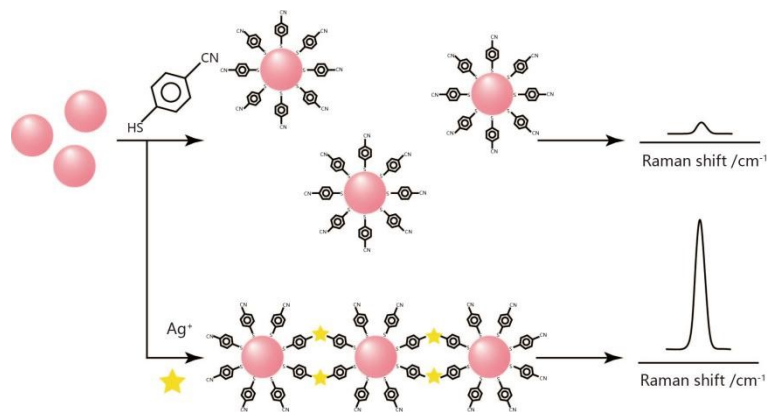

**Fig. S2.** The schematic diagram between the functionalized Au NPs and Ag<sup>+</sup>.

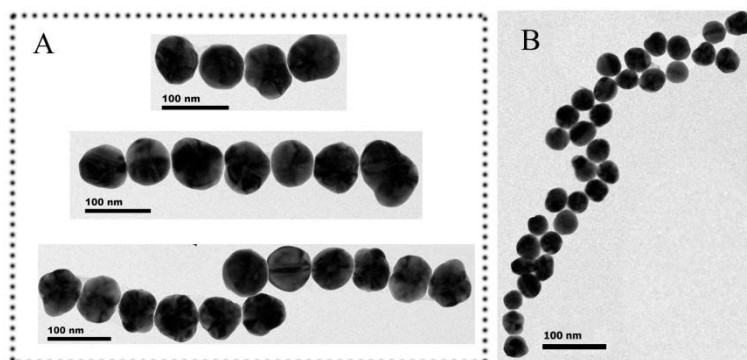

**Fig. S3.** (A) The TEM image of functionalized Au NPs with different concentration of  $\text{Ag}^+$  (1 nM, 10 nM, 100 nM), (B) The TEM image of functionalized Au NPs with different concentration of  $\text{Ag}^+$  (1000 nM).

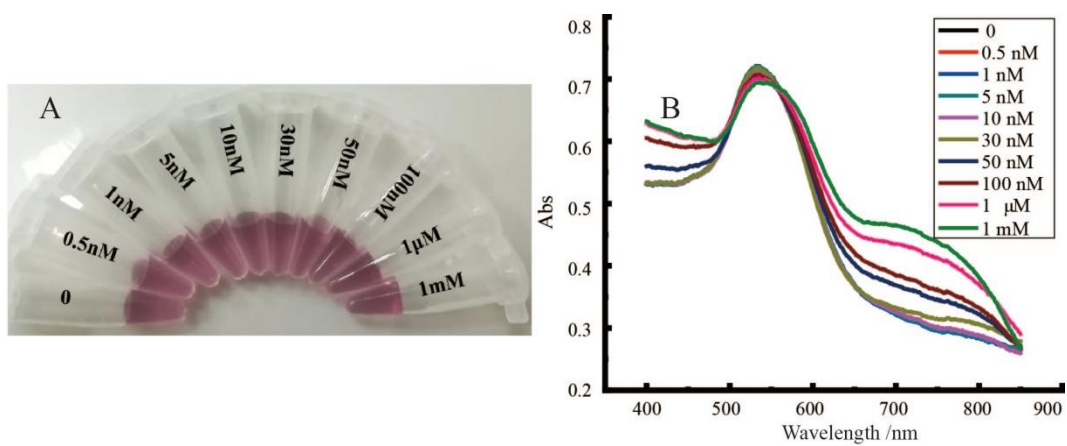

**Fig. S4.** (A) Figure of color change of the functional Au NPs with different concentration of  $\text{Ag}^+$ , (B) UV-*vis* spectroscopy of the functional Au NPs with different concentration of  $\text{Ag}^+$ .

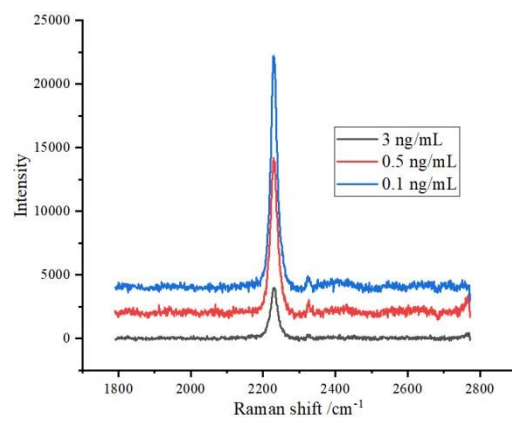

**Fig. S5.** (A) SERS spectroscopy of the detection system for different concentration of ALP.

**Table S1.** Comparison of the performance of the SERS based ALP detection technique with the other existing methods.

| Material                   | Method           | Linear range (U/L) | LOD (U/L) | Reference                         |
|----------------------------|------------------|--------------------|-----------|-----------------------------------|
| CQDs                       | Fluorescence     | 16.7-782.6         | 1.1       | Qian et al., 2015 <sup>[1]</sup>  |
| Electrospun fibrous strips | Fluorescence     | 5-100              | 1.5       | Zhao et al., 2017 <sup>[2]</sup>  |
| CdSe nanoparticles         | Electrochemistry | 2-25               | 2         | Jiang et al., 2012 <sup>[3]</sup> |
| CoOOH nanoflakes           | Electrochemistry | 1.25-100           | 0.37      | Rao et al., 2022 <sup>[4]</sup>   |
| Sulfuration-engineered     | Colorimetry      | 0.8-320            | 0.38      | Song et al., 2020 <sup>[5]</sup>  |
| Fe/C NS                    | Colorimetry      | 0.05-6             | 0.03      | Zhou et al., 2021 <sup>[6]</sup>  |
| Ag NPs                     | SERS             | 0.72-3             | 0.01      | Zeng et al., 2017 <sup>[7]</sup>  |
| 2-MBQ                      | SERS             | 1-300              | 0.38      | Xi et al., 2022 <sup>[8]</sup>    |
| Functionalized Au NPs      | SERS             | 0.2-2.0            | 0.005     | This work                         |

1. Z. S. Qian, L. J. Chai, Y. Y. Huang, C. Tang, J. J. Shen, J. R. Chen and H. Feng, *Biosens. Bioelectron.*, 2015, **68**, 675.
2. L. Zhao, S. Xie, X. Song, J. Wei, Z. Zhang and X. Li, *Biosens. Bioelectron.*, 2017, **91**, 217.
3. H. Jiang and X. Wang, *Anal. Chem.*, 2012, **84**, 6986.
4. H. Rao, J. Li, M. Luo, K. Zhang, H. Guo, H. Liu and Z. Xue, *Anal. Bioanal. Chem.*, 2022, **414**, 2991.
5. H. Song, X. Niu, K. Ye, L. Wang, Y. Xu and Y. Peng, *Anal. Bioanal. Chem.*, 2020, **412**, 5551.
6. X. Zhou, M. Wang, M. Wang and X. Su, *ACS Appl. Nano Mater.*, 2021, **4**, 7888.
7. Y. Zeng, J. Q. Ren, S. K. Wang, J. M. Mai, B. Qu, Y. Zhang, A. G. Shen and J. M. Hu, *ACS Appl. Mater. Interfaces*, 2017, **9**, 29547.
8. C. Y. Xi, M. Zhang, L. Jiang, H. Y. Chen, J. Lv, Y. He, M. E. Hafez, R. C. Qian, D. W. Li, *Sens. Actuat. B-Chem.*, 2022, **369**, 132264.

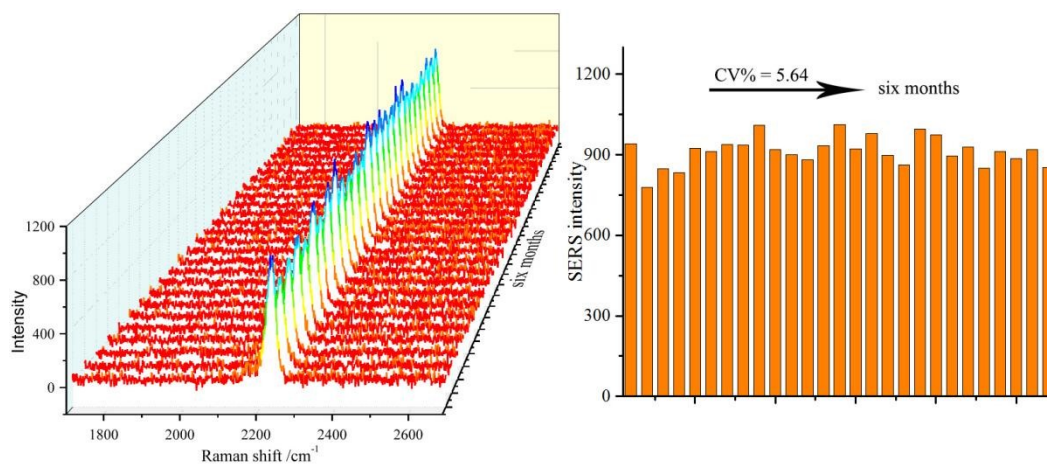

**Fig. S6.** Stability of functional Au NPs over a period of six months.
